# Supplementary material for: Sn-doped bismuth telluride nanowires with high conductivity
Source: Royal Society of Chemistry journal article supplement (doi:10.1039/c2nr32172f), 2012-01-01
Supplement: c2nr32172f.pdf [file c2nr32172f.pdf]

## Supporting Information

# Sn-doped Bismuth Telluride Nanowires with High Conductivity

*Gang Mi,<sup>a</sup> Likai Li,<sup>b</sup> Yuanbo Zhang,<sup>b</sup> and Gengfeng Zheng<sup>\*a</sup>*

<sup>a</sup> Laboratory of Advanced Materials, Department of Chemistry, Fudan University, Shanghai 200433, China; <sup>b</sup> State Key Laboratory of Surface Physics and Department of Physics, Fudan University, Shanghai 200433, China

\* Corresponding author: [gfzheng@fudan.edu.cn](mailto:gfzheng@fudan.edu.cn) (G.Z.)

This file contains:

Methods, and Supporting Figures S1—S2

## Methods

*Materials and Synthesis.* Sn-doped Bi<sub>2</sub>Te<sub>3</sub> nanowires were prepared in a horizontal tube furnace equipped with a 1-inch diameter quartz tube (Linderberg Blue M, Model TF55030KC-1, Thermal Fisher Co., USA). The Si/SiO<sub>2</sub> wafer was first thermally evaporated a 2 nm Sn layer, and then cut into 1 × 1 cm<sup>2</sup> size as growth substrates. Right before use, the growth substrate was coated with 0.1% w/v aqueous poly-*L*-lysine solution (Ted Pella Inc., USA) for 1 min, followed by functionalization with 13-nm-diameter home-made Au colloid solution for 15 s. In a typical reaction, 0.2 g Bi<sub>2</sub>Te<sub>3</sub> powder (99.999%, Alfa Aesar, USA) was loaded in a porcelain boat and placed at the center of furnace. The growth substrate was placed ~ 16 cm away from the source materials. Argon (99.99%) and hydrogen (99.99%) were used as carrier gases. The quartz tube was first pumped to a base pressure of ~ 10<sup>-2</sup> Torr and flushed with carrier gases for 3 times to remove O<sub>2</sub> residue. Then the temperature and the growth pressure were raised to 480 °C and 70 kPa within 5 min, under 25 standard cubic centimeters (sccm) Ar and 25 sccm H<sub>2</sub> gas flow. The reaction was kept for 30 min, before the furnace was quickly pumped and cooled down.

*Structural characterization.* The as-grown NWs were directly characterized with a Hitachi S4800 SEM (Japan). For TEM and EDX characterization, the growth substrate were sonicated in 100 μL ethanol for 10 s to disperse the as-grown NWs, and the ethanol suspension was dropped onto a Cu grid (Lacey Formvar/Carbon #01883-F, Ted Pella Inc., USA). TEM and SAED analysis were performed with a JEOL-2100F TEM (Japan). Raman spectra were collected on a Horiba-Jobin-Yvon LabRam-1B Raman spectrometer equipped with a He-Ne laser with a wavelength of 632.8 nm and a 700 nm laser spot. The samples were placed on a silicon wafer

with a 300-nm-thick silica layer. The spectra were recorded in the range of 50–250  $\text{cm}^{-1}$ . All spectra were collected through a 100X objective lens in the backscattering mode with a 1800 grooves/mm grating and a CCD detector.

*Electrical measurement.* The electrodes were defined by a shadow mask, followed by the thermal deposition of 5 nm Cr and 30 nm Au. The electrical transport measurement was carried out in helium, with a current pre-amplifier (1211, DL Instruments LLC., USA), a lock-in amplifier (SR8300, Stanford Research Systems, USA), and a temperature control system (Lakeshore 340, USA). Low temperature atmosphere was provided by Oxford Integra TM AC Recondensing liquid helium cryostat.

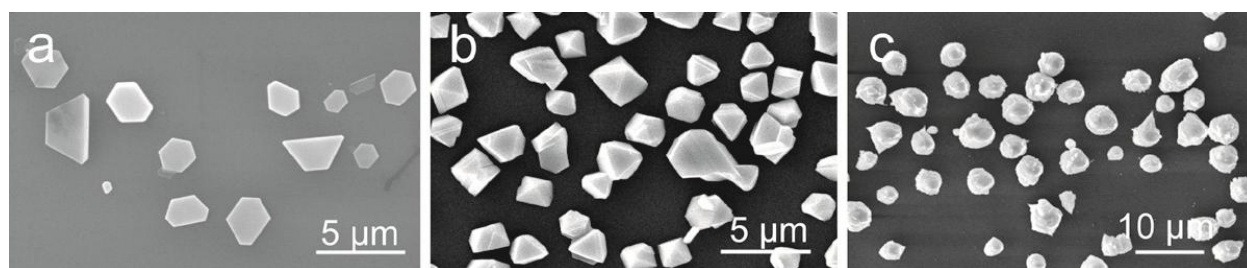

**Figure S1.** SEM images of different morphologies of bismuth telluride grown at different temperatures and pressures: (a) 480 °C and 3 kPa, nanoplates, (b) 540 °C and 3 kPa, nano-octahedrons, and (c) 600 °C and 3 kPa, nanospheres.

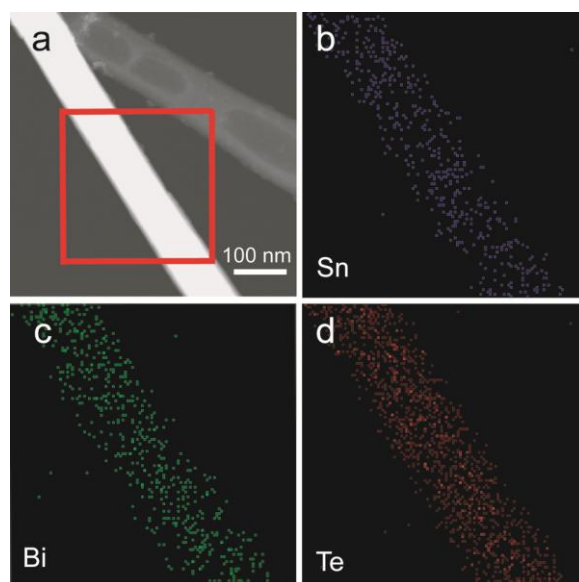

**Figure S2.** (a) STEM image of a  $\text{Bi}_2\text{Te}_3$  NW; (b–d) Elemental mapping of (b) Sn, (c) Bi, and (d) Te in the middle segment of this NW, as highlighted in the red box in (a).
